# Supplementary material
Source: publisher figshare collection journal article supplement (https://geolsoc.figshare.com/ndownloader/files/25995924)
Supplement: Supplementary file 1 [file 25995924]

## Sheet: Sample Locations
	Supplementary File 1. Sample Locations & Modal Percentages
		UTM Coordinates*
	Sample	Easting (m)	Northing (m)	Lithology	Unit Name	Deformation
	Northern Mylonite Zone
	181-S55	368532	7.1634e+06	Hbl Granodiorite	Cerro del Pingo Complex (132-132 Ma)	Protomylonitic
	188-S156	368964	7161166	Bt-Hbl Tonalite	Cerro del Pingo Complex (132-132 Ma)	Protomylonitic
	181-S462	368735	7161405	Bt-Hbl Tonalite	Cerro del Pingo Complex (132-132 Ma)	Protomylonitic
	181-S456	368530	7161422	Bt-Hbl Tonalite	Cerro del Pingo Complex (132-132 Ma)	Mylonitic
	161-62	370931	7.15247e+06	Bt-Hbl Tonalite	Cerro del Pingo Complex (119 Ma)	Unstrained
	161-59	370868	7152466	Metasedimentary	Chañaral Complex	Protomylonitic
	161-58	370812	7152467	Bt-Hbl Tonalite	Cerro del Pingo Complex (119 Ma)	Protomylonitic
	161-57	370790	7152464	Metasedimentary	Chañaral Complex	Mylonitic
	Southern Mylonite Zone
	161-74	374811	7.13113e+06	Bt-Hbl Tonalite	Cerro del Pingo Complex (119 Ma)	Protomylonitic/Discrete Zones
	181-N154	375288	7.12581e+06	Hbl Qtz Diorite	Cerro del Pingo Complex (132-132 Ma)	Unstrained
	171-N338	375198	7125867	Hbl Tonalite	Cerro del Pingo Complex (132-132 Ma)	Unstrained
	Felsic Intrusions west of the western branch
	191-N46	366334	7.13824e+06	Granite	Leucocratic Plutons	Unstrained
	191-SM222	366740	7137706	Granite	Leucocratic Plutons	Unstrained
	191-SM225	366674	7136861	Granite	Leucocratic Plutons	Unstrained
	191-SM229	366368	7135350	Granite	Leucocratic Plutons	Unstrained
	191-SM230	366734	7135394	Granite	Leucocratic Plutons	Unstrained
	Felsic intrusions between the western & eastern branch
	188-S142	366809	7.16121e+06	Granite	Leucocratic Plutons	Unstrained
	191-N42	367961	7156609	Granite	Leucocratic Plutons	Unstrained
	Quebrada San Ramon felsic intrusion
	161-19	355083	7191605	Granite	Leucocratic Plutons	Unstrained
	181-S251	355107	7191609	Granite	Leucocratic Plutons	Unstrained
	201-SM482	355119	7.19163e+06	Granite	Leucocratic Plutons	Unstrained
	201-SM458	355383	7191168	Granite	Leucocratic Plutons	Unstrained
	*Coordinates in Universal Transverse Mercator (UTM) World Geodetic System 1984 (WGS84), Zone 19

## Sheet: Modal Percentages
		Plagioclase	Alkali Feldspar	Quartz	Biotite	Hornblende	Trace/Other
	Northern Mylonite Zone
	~134-132 Cerro del Pingo Complex	47-56	4-15	21-28	4-15	6-13	<1
	~119 Ma Pluton	50-62	<1	19-30	6-17	6-21	<1
	Southern Mylonite Zone
	~134-132 Cerro del Pingo Complex	52-74	<1	7-25	<1	16-37	1-5
	~119 Ma Pluton	47-59	<1	16-27	11-18	6-20	4-5
	Non-mylonitized Plutons
	Cerro Concha Pluton	35-60	7-25	21-23	<1-23	1-9	4-5
	Quebrada San Ramon Leucocratic Intrusions	7-30	31-50	21-34	<10	<1-9	1-5
	Central Leucocratic Intrusions	19-33	29-36	30-43	<1-8	<1	3-5
	Southwestern Leucocratic Intrusions	34-35	24-44	27-28	<1-6	<1	<1
